# Supplementary material for: Exploration of chromophores for a VCD couplet in a spectrally transparent infrared region for biomolecules
Source: Royal Society of Chemistry journal article supplement (doi:10.1039/d1cp04074j), 2021-01-01
Supplement: d1cp04074j1.pdf [file d1cp04074j1.pdf]

## Exploration of Chromophores for VCD Couplet in Biomolecularly Transparent Infrared Region

Tohru Taniguchi,<sup>\*a</sup> Mohamad Zarif Mohd Zubir,<sup>b</sup> Nobuyuki Harada<sup>c</sup> and Kenji Monde<sup>\*a</sup>

<sup>a</sup> *Frontier Research Center for Advanced Material and Life Science, Faculty of Advanced Life Science, Hokkaido University, Kita 21 Nishi 11, Sapporo 001-0021, Japan*

<sup>b</sup> *Graduate School of Life Science, Hokkaido University, Kita 21 Nishi 11, Sapporo 001-0021, Japan*

<sup>c</sup> *Institute of Multidisciplinary Research for Advanced Materials, Tohoku University, 2-1-1 Katahira, Aoba, Sendai 980-8577, Japan*

### Supporting Information

|     |                                                                                   |
|-----|-----------------------------------------------------------------------------------|
| S2  | Supporting Figures                                                                |
| S6  | Synthesis of <b>2</b> , <b>3</b> , <b>4</b> , <b>5</b> , <b>2a</b> , and <b>6</b> |
| S11 | References                                                                        |
| S12 | NMR Spectra of <b>2a</b>                                                          |
| S14 | Optimized Cartesian Coordinates                                                   |

## Supporting Figures

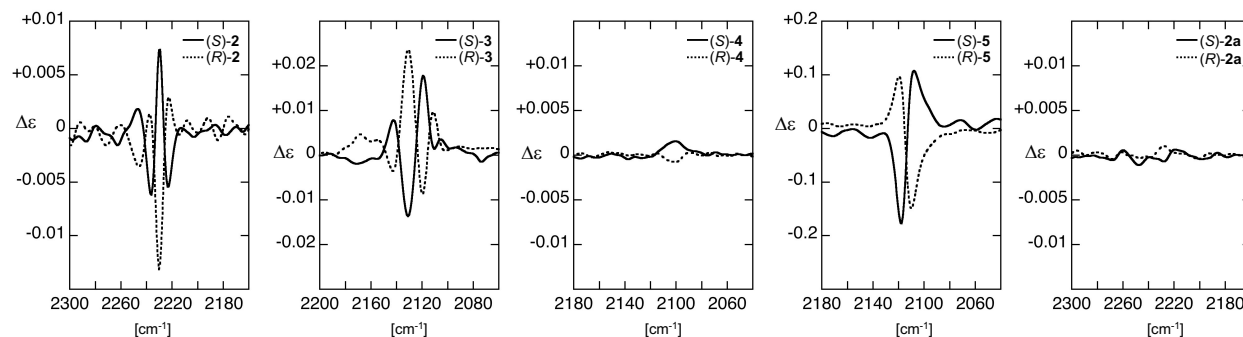

**Fig. S1** VCD spectra of enantiomeric pairs of **2-5** without “enantiomer correction” in the 2300-2000  $\text{cm}^{-1}$  region. Measurement conditions are described in the caption of Figures 2 and 3.

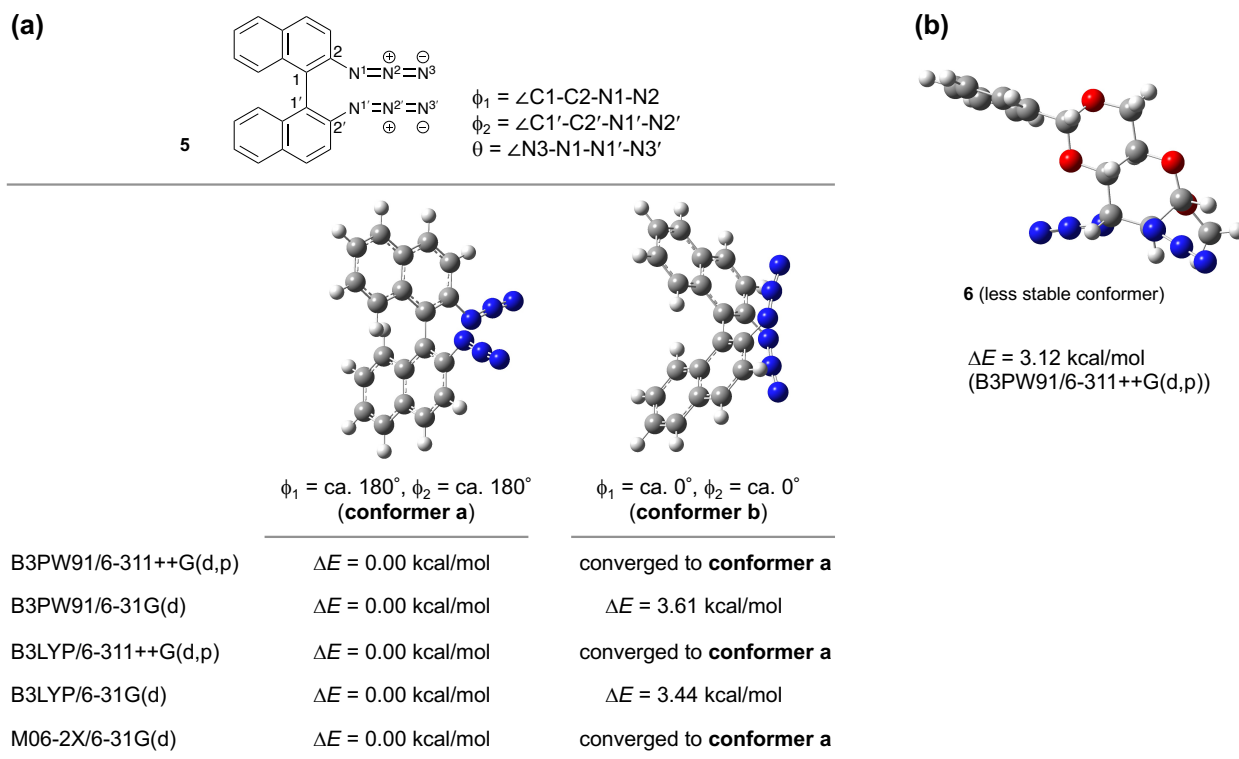

**Fig. S2** Less stable conformers of **5** and **6**. (a) Three geometries with  $(\phi_1, \phi_2) = (0^\circ, 0^\circ)$ ,  $(0^\circ, 180^\circ)$ , and  $(180^\circ, 180^\circ)$  were submitted to DFT optimization. With B3PW91/6-311++G(d,p) level of optimization, all geometries were converged to a conformer with angles  $\phi_1$  and  $\phi_2$  of approximately  $180^\circ$  and  $180^\circ$  ( $\theta = -23^\circ$ ). Some of different DFT levels yielded the second most stable conformer with  $\phi_1$  and  $\phi_2$  of approximately  $0^\circ$  and  $0^\circ$  with  $\Delta E$  of higher than 3.0 kcal/mol. Conformers with  $(\phi_1, \phi_2) = (0^\circ, 180^\circ)$  could not be obtained by all the tested calculation conditions. (b) The second most stable conformer of **6** predicted at DFT/B3PW91/6-311++G(d,p).

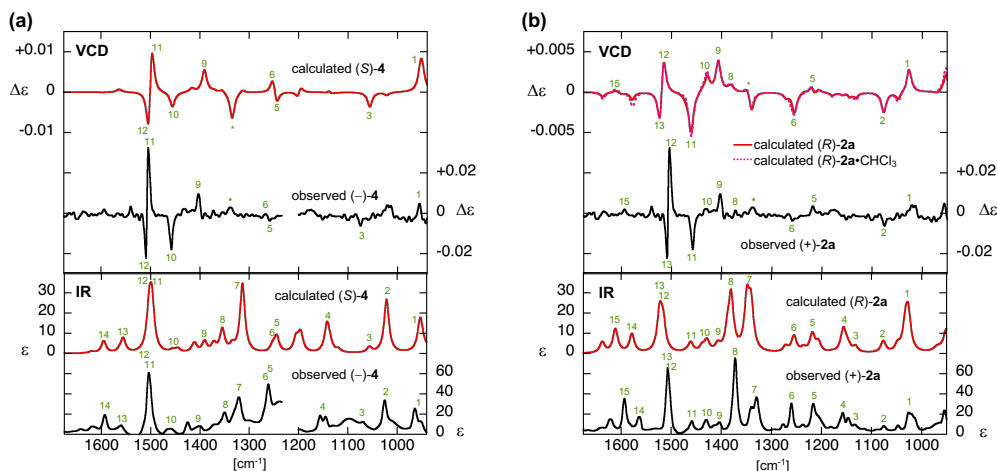

**Fig. S3** Assignment of the chirality of (a) (-)-**4** and (b) (+)-**2a** by comparison of calculated and observed VCD (top) and IR (bottom) spectra. Theoretical VCD spectrum for (*R*)-**2a** was almost superimposable to that for (*R*)-**2a**•CHCl<sub>3</sub>. Part of corresponding VCD and IR peaks are labelled, while nonmatching peaks are indicated by asterisks. Measurement conditions: *c* 0.6 M in CHCl<sub>3</sub> (for (-)-**4**) or 0.3 M in CDCl<sub>3</sub> (for (+)-**2a**), *l* 50  $\mu\text{m}$  (for (-)-**4**) or 100  $\mu\text{m}$  (for (+)-**2a**), corrected by solvent spectra. Calculation conditions: B3PW91/6-311++G(d,p). Frequency scaling factor: 0.97 (for (*S*)-**4**) or 0.98 (for (*R*)-**2a**). Part of observed spectra are omitted due to strong solvent absorption.

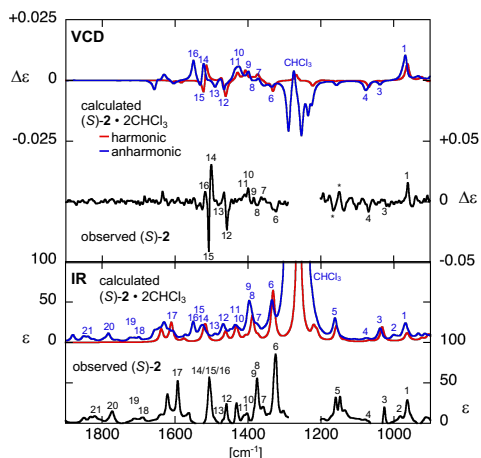

**Fig. S4** VCD (top) and IR (bottom) of measured (black) for (*S*)-**2** and calculated (red for harmonic DFT and blue for anharmonic DFT) spectra (*S*)-**2**•2CHCl<sub>3</sub>. Part of corresponding VCD and IR peaks of observed spectra and anharmonically calculated spectra are labelled, while nonmatching peaks are indicated by asterisks. Both the anharmonic and harmonic VCD spectra were qualitatively similar to observed one, whereas only anharmonically calculated IR spectrum well reproduced the observed anharmonic signals in the region above 1600  $\text{cm}^{-1}$  (peaks 18-21). Measurement conditions: *c* 0.3 M in CHCl<sub>3</sub>, *l* 50  $\mu\text{m}$ , corrected by solvent spectra. Calculation conditions: B3PW91/6-311++G(d,p). Harmonic calculated spectra are scaled by a factor of 0.98, while anharmonic ones are unscaled. Part of observed spectra are omitted due to strong solvent absorption.

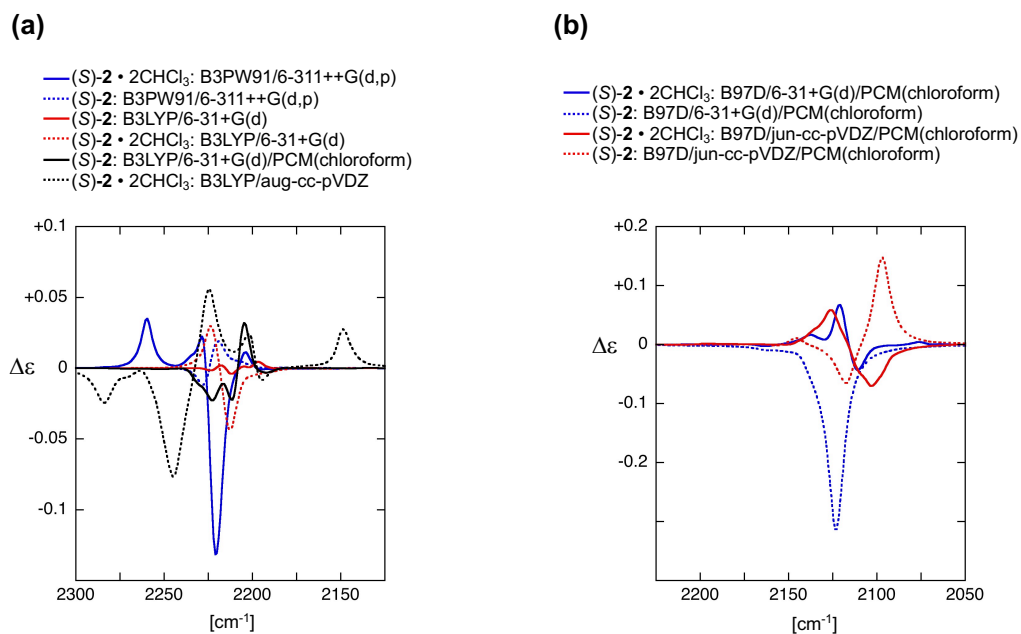

**Fig. S5** Predicted VCD patterns of (S)-2 by anharmonic DFT using (a) B3PW91 or B3LYP, or (b) B97D functionals. All spectra were scaled by a factor of 0.967.

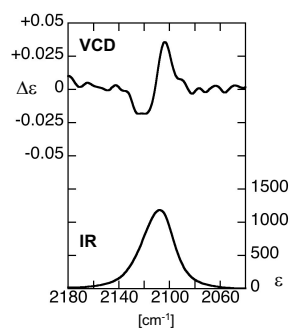

**Fig. S6** Observed VCD and IR spectra of **6** in DMSO-*h*<sub>6</sub> – H<sub>2</sub>O (9:1) mixed solvent. Measurement conditions: *c* 0.04 M, *l* 50 μm, corrected by solvent spectra.

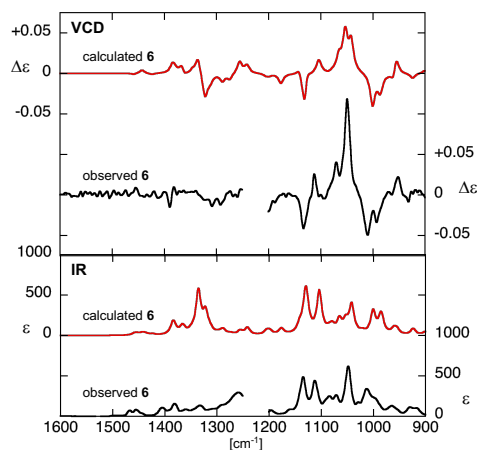

**Fig. S7** VCD (top) and IR (bottom) of measured and calculated spectra for **6**. Agreement between the experimental and theoretical spectra supported the validity of the molecular geometry used for spectral calculations. Measurement conditions:  $c$  0.3 M in  $\text{CHCl}_3$ ,  $l$  50  $\mu\text{m}$ , corrected by solvent spectra. Calculation conditions: harmonic DFT at B3PW91/6-311++G(d,p). Frequency scaling factor: 0.97.

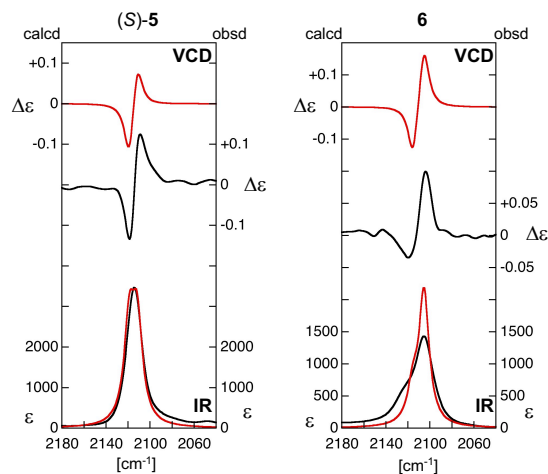

**Fig. S8** Comparison of the VCD and IR (bottom) spectra observed for *(S)*-**5** and **6** and those calculated using harmonic DFT at B3PW91/6-31G(d). The observed spectra are the same as those shown in Figure 2 and 4. Frequency scaling factor: 0.936 (for *(S)*-**5**) and 0.931 (for **6**).

## Synthesis of 2, 3, 4, 5, 2a, and 6

### General Procedures

<sup>1</sup>H NMR (500 MHz) and <sup>13</sup>C NMR (125 MHz) spectra were recorded on a Varian Inova instrument at 25 °C. Chemical shift values ( $\delta$ ) are reported in ppm relative to tetramethylsilane. The following abbreviations were used for signal multiplicities: s = singlet; d = doublet; m = multiplet. Optical rotations were measured on a JASCO P-1020 polarimeter at the sodium D-line under ambient temperature, and reported as  $[\alpha]_D$  (concentration in grams/100 mL solvent). Enantioseparation of **2** and **4** was performed by using a uf-3020SZB2 pump (Denso Sangyo, Japan) equipped with a Shimamura (Japan) YRU-880 midiget UV-RI detector, using a Daicel CHIRALFLASH<sup>®</sup> IC column (3.0 cm  $\phi$   $\times$  10 cm). Enantioseparation of **2a** was conducted on two JASCO PU-2086 intelligent pumps equipped with a JASCO MX-2080-31 solvent mixing module on a PU-2075 intelligent UV/Vis detector, using a Daicel CHIRALPAK<sup>®</sup> IB column (1.0 cm  $\phi$   $\times$  25 cm). Spectroscopic grade CHCl<sub>3</sub> and CDCl<sub>3</sub> were purchased from Wako Pure Chemical Industries and Cambridge Isotope Laboratories, respectively. Purchased chemicals were used without further purification. Synthesis of (*S*)-**1** and (*R*)-**1** is reported previously.<sup>[1]</sup>

### Synthesis of (*S*)-**2** and (*R*)-**2**

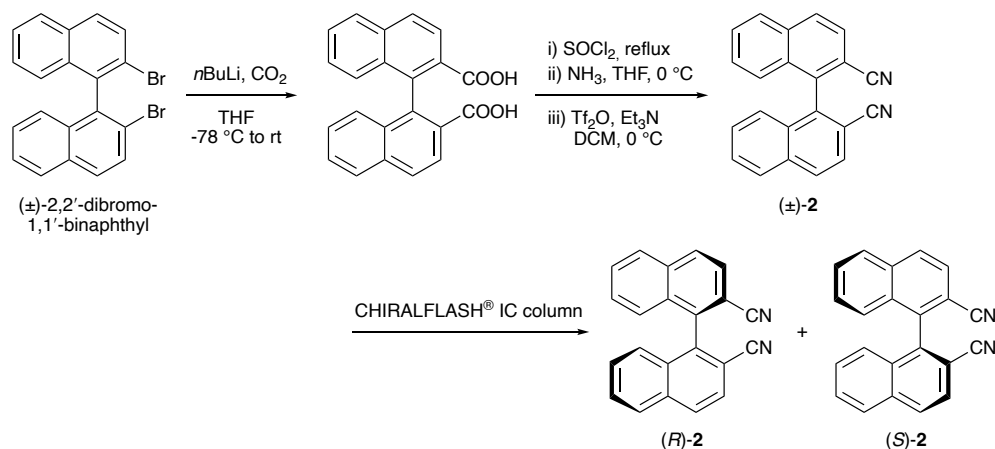

Conversion from (±)-2,2'-dibromo-1,1'-binaphthyl to (±)-**2** was carried out in a similar manner to a reported procedure.<sup>[2]</sup> (±)-2,2'-dibromo-1,1'-binaphthyl (206 mg, 499  $\mu$ mol) in THF (10 mL) was added *n*-butyllithium in hexane (2.5 M, 0.48 mL) dropwise under N<sub>2</sub> at -78 °C. After 30 mins, N<sub>2</sub> was replaced with CO<sub>2</sub>, and the mixture was stirred at -78 °C for 1.5 h and then gradually brought to rt overnight. The reaction was quenched with 2 M HCl aq and then extracted using Et<sub>2</sub>O. The organic layer was washed with brine, and then dried over MgSO<sub>4</sub>. After removal of the solvent, the mixture was purified by silica-gel column chromatography (hexane-EtOAc-AcOH = 95:5:1 to 80:20:1), which afforded (±)-1,1'-binaphthyl-2,2'-dicarboxylic acid<sup>[3]</sup> (105 mg, 61%).

The diacid (105 mg) was added SOCl<sub>2</sub> (2 mL) and the mixture was refluxed. After 15 mins, the mixture was dried under reduced pressure. The residue was dissolved in THF (1 mL) and then bubbled with NH<sub>3</sub>

gas at 0 °C for 10 mins. After removal of the solvent, the residue was dissolved in DCM (1 mL) and added Tf<sub>2</sub>O (0.25 mL) and Et<sub>3</sub>N (0.5 mL) and the mixture was stirred at 0 °C. After 40 mins, the mixture was diluted with EtOAc, washed sequentially with 2 M HCl aq and brine, and then dried over MgSO<sub>4</sub>. After removal of the solvent, the mixture was purified by silica-gel column chromatography (hexane-EtOAc = 8:1 to 1:1), which afforded (±)-**2**<sup>[3]</sup> (34 mg, 37% from diacid).

Enantioseparation of (±)-**2** was carried out on a CHIRALFLASH<sup>®</sup> IC column (3.0 cm  $\phi$  × 10 cm) using hexane-EtOAc = 4:1, which led to the first-eluted (*R*)-(-)-**2** and the second-eluted (*S*)-(+)-**2**. (*R*)-(-)-**2**: [ $\alpha$ ]<sub>D</sub> -43.8 (c 1.0, CHCl<sub>3</sub>); lit<sup>[4]</sup> [ $\alpha$ ]<sub>D</sub> -70.5 (c 1, CHCl<sub>3</sub>). (*S*)-(+)-**2**: [ $\alpha$ ]<sub>D</sub> +44.3 (c 1.0, CHCl<sub>3</sub>); lit<sup>[4]</sup> [ $\alpha$ ]<sub>D</sub> +68.6 (c 1.54, CHCl<sub>3</sub>).

### Synthesis of (*S*)-**3** and (*R*)-**3**

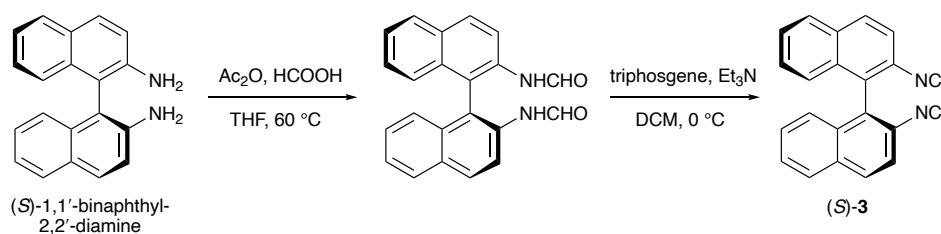

(*S*)-**3** was synthesized in a similar manner to a reported procedure.<sup>[5]</sup> Formic acid (500  $\mu$ L) was added to Ac<sub>2</sub>O (60  $\mu$ L) at 0 °C and the solution was stirred at 60 °C for 30 mins. To this solution, THF (0.5 mL) and (*S*)-1,1'-binaphthyl-2,2'-diamine (32 mg, 113  $\mu$ mol) in THF (0.5 mL) were successively added at 0 °C and the mixture was stirred at 60 °C. After 3 h, the mixture was diluted with EtOAc, washed sequentially with sat NaHCO<sub>3</sub> aq and brine, and then dried over MgSO<sub>4</sub>. After removal of the solvent, the mixture was purified by silica-gel column chromatography (hexane-EtOAc = 1:3 to 1:19), which afforded (*S*)-1,1'-binaphthyl-2,2'-diformamide containing some impurities (23 mg). Without further purification, the diformamide (23 mg) and Et<sub>3</sub>N (150  $\mu$ L) in DCM (0.7 mL) was added a 0.3 mL DCM solution of triphosgene (33 mg) dropwise at 0 °C and stirred at rt. After 1.5 h, the solvent was removed and the residue was purified by silica-gel column chromatography (hexane-EtOAc = 3:1 to 1:3), which afforded (*S*)-**3**<sup>[5]</sup> (10 mg, 29% from diamine).

(*R*)-**3**<sup>[6]</sup> was prepared from (*R*)-1,1'-binaphthyl-2,2'-diamine using a similar procedure.

### Synthesis of (*S*)-**4** and (*R*)-**4**

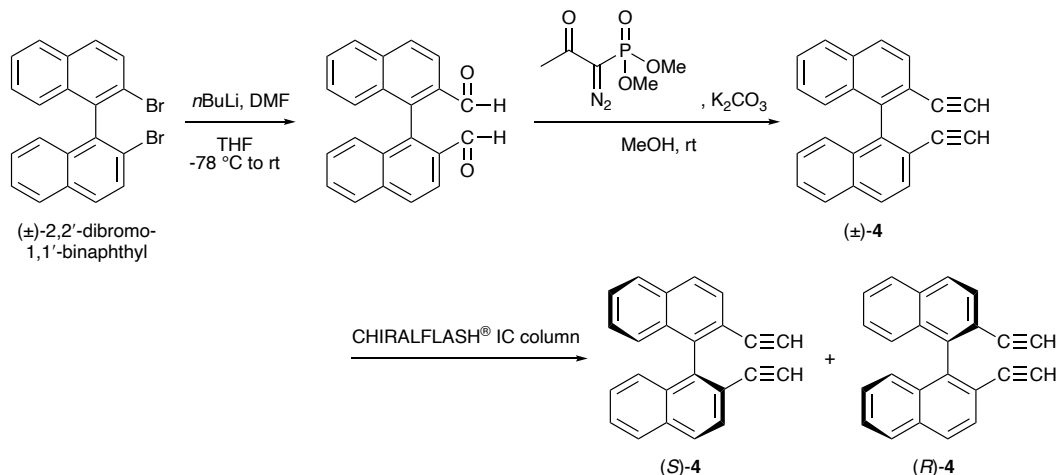

Conversion from (±)-2,2'-dibromo-1,1'-binaphthyl to (±)-**4** was carried out in a similar manner to a reported procedure.<sup>[7]</sup> (±)-2,2'-dibromo-1,1'-binaphthyl (418 mg, 1.01 mmol) in THF (10 mL) was added *n*-butyllithium in hexane (2.5 M, 0.96 mL) dropwise under N<sub>2</sub> at -78 °C. After 30 mins, the mixture was added DMF (2.3 mL), stirred at -78 °C for 40 mins, and then gradually brought to rt overnight. The reaction mixture was diluted with Et<sub>2</sub>O and the organic layer was washed with sat NH<sub>4</sub>Cl aq. The aqueous layer was extracted with Et<sub>2</sub>O. All organic layers were combined and dried over MgSO<sub>4</sub>. After removal of the solvent, the mixture was purified by silica-gel column chromatography (hexane-EtOAc = 10:1 to 4:1), which afforded (±)-2,2'-diformyl-1,1'-binaphthyl<sup>[7]</sup> (85 mg, 27%).

The dialdehyde (85 mg, 274 μmol) and K<sub>2</sub>CO<sub>3</sub> (85 mg) in MeOH (10 mL) was added Bestmann-Ohira reagent (165 μL) and stirred at rt for overnight. The reaction mixture was diluted with Et<sub>2</sub>O and the organic layer was washed with sat NH<sub>4</sub>Cl aq. The aqueous layer was extracted with Et<sub>2</sub>O. All organic layers were combined and dried over MgSO<sub>4</sub>. After removal of the solvent, the mixture was purified by silica-gel column chromatography (hexane-EtOAc = 25:1 to 20:1), which afforded (±)-**4**<sup>[7]</sup> (27 mg, 33%).

Enantioseparation of (±)-**4** was carried out on a CHIRALFLASH® IC column (3.0 cm ϕ × 10 cm) using hexane-EtOAc = 50:1, which led to the first-eluted (-)-**4** and the second-eluted (+)-**4**. The absolute configurations of these enantiomers were determined to be (*S*)-(-)-**4** and (*R*)-(+)-**4** by using VCD spectroscopy (Fig. S3a). (*S*)-(-)-**4**: [α]<sub>D</sub> -28.4 (c 1.0, CHCl<sub>3</sub>). (*R*)-(+)-**4**: [α]<sub>D</sub> +27.2 (c 1.0, CHCl<sub>3</sub>).

### Synthesis of (*S*)-**5** and (*R*)-**5**

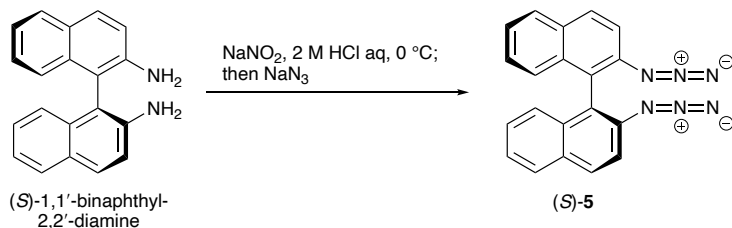

(*S*)-**5** was synthesized in a similar manner to a reported procedure.<sup>[8]</sup> (*S*)-1,1'-binaphthyl-2,2'-diamine (142 mg, 499 μmol) in 2 M HCl aq (3.5 mL) was added NaNO<sub>2</sub> (105 mg) in H<sub>2</sub>O (1 mL) and stirred at 0 °C.



After 1 h, the mixture was added NaN<sub>3</sub> (135 mg) in H<sub>2</sub>O (1 mL) dropwise at 0 °C and stirred at rt for overnight. The mixture was diluted with EtOAc, washed sequentially with sat NaHCO<sub>3</sub> aq and brine, and then dried over MgSO<sub>4</sub>. After removal of the solvent, the mixture was purified by silica-gel column chromatography (hexane-EtOAc = 99:1), which afforded (*S*)-**5** (146 mg, 87%). Its NMR data were virtually identical with those reported for (±)-**5**.<sup>[8]</sup> (*S*)-(-)-**5**: [α]<sub>D</sub> -42.1 (c 1.0, CHCl<sub>3</sub>).

(*R*)-**5**<sup>[9]</sup> was prepared from (*R*)-1,1'-binaphthyl-2,2'-diamine using a similar procedure.

### Synthesis of (*S*)-**2a** and (*R*)-**2a**

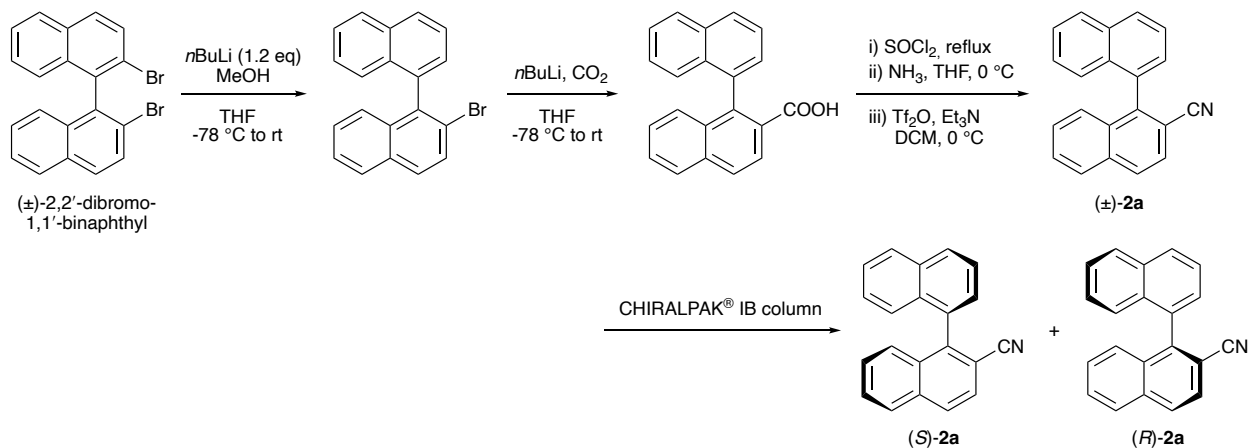

Conversion from (±)-2,2'-dibromo-1,1'-binaphthyl to (±)-1,1'-binaphthyl-2-carboxylic acid was carried out in a similar manner to a reported procedure.<sup>[10]</sup> (±)-2,2'-dibromo-1,1'-binaphthyl (412 mg, 1.00 mmol) in THF (10 mL) was added *n*-butyllithium in hexane (2.6 M, 0.46 mL) dropwise under N<sub>2</sub> at -78 °C. After 1 h, the mixture was added MeOH (1 mL) and stirred for 10 mins at -78 °C. The mixture was diluted with CHCl<sub>3</sub>, washed with brine, and then dried over MgSO<sub>4</sub>. After removal of the solvent, the residue was dissolved in THF (10 mL) and added *n*-butyllithium in hexane (2.6 M, 0.58 mL) dropwise under N<sub>2</sub> at -78 °C. After 15 mins, N<sub>2</sub> was replaced with CO<sub>2</sub>, and the mixture was gradually brought to rt over 1 h. The reaction mixture was diluted with CHCl<sub>3</sub>, washed with 2 M HCl aq, and then dried over MgSO<sub>4</sub>. After removal of the solvent, the mixture was purified by silica-gel column chromatography (CHCl<sub>3</sub>-MeOH = 15:1), which afforded (±)-1,1'-binaphthyl-2-carboxylic acid<sup>[10]</sup> (165 mg, 55% in 2 steps).

The following conversion from monoacid to (±)-**2a** was performed in a similar manner to the synthesis of (±)-**2**. The monoacid (160 mg) was added SOCl<sub>2</sub> (3 mL), and the mixture was refluxed. After 10 mins, the mixture was dried under reduced pressure. The residue was dissolved in THF (2 mL) and then bubbled with NH<sub>3</sub> gas at 0 °C for 10 mins. After removal of the solvent, the residue was dissolved in DCM (2 mL) and added Tf<sub>2</sub>O (0.8 mL) and Et<sub>3</sub>N (1 mL) and the mixture was stirred at 0 °C. After 40 mins, the mixture was diluted with EtOAc, washed sequentially with 2 M HCl aq, sat NaHCO<sub>3</sub> aq and brine, and then dried over MgSO<sub>4</sub>. After removal of the solvent, the mixture was purified by silica-gel column chromatography (hexane-EtOAc = 15:1), which afforded (±)-**2a**<sup>[11]</sup> (80 mg, 54% from monoacid).

Enantioseparation of ( $\pm$ )-**2a** was carried out on a CHIRALPAK<sup>®</sup> IB column (1.0 cm  $\phi$   $\times$  25 cm) using hexane-EtOH = 95:5, which led to the first-eluted (–)-**2** at  $t_1 = 10.7$  min and the second-eluted (*S*)-(+)-**2** at  $t_2 = 11.4$  min. The separation factor  $\alpha$  was calculated as 1.1, where  $t_0 = 4.0$  min was used. The absolute configurations of these enantiomers were determined to be (*S*)-(–)-**2a** and (*R*)-(+)-**2a** by using VCD spectroscopy (Fig. S3b). (*S*)-(–)-**2a**:  $[\alpha]_D -112$  (*c* 1.0, CHCl<sub>3</sub>). (*R*)-(+)-**2a**:  $[\alpha]_D +106$  (*c* 1.0, CHCl<sub>3</sub>); ; lit<sup>[12]</sup> for (+)-**2a**:  $[\alpha]_D +89.0$  (*c* 1.0, CHCl<sub>3</sub>).

### Synthesis of **6**

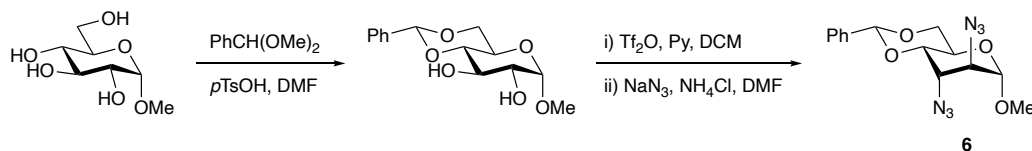

Methyl  $\alpha$ -D-glucopyranoside (1.95 g, 10.0 mmol) in DMF (35 mL) was added benzaldehyde dimethoxy acetal (2 mL) and a catalytic amount of *p*-TsOH $\cdot$ H<sub>2</sub>O and stirred at rt overnight. The mixture was diluted with CHCl<sub>3</sub>, washed sequentially with sat NaHCO<sub>3</sub> aq and brine, and dried over MgSO<sub>4</sub>. After removal of the solvent, the mixture was purified by recrystallization with EtOH and hexane, which afforded methyl 4,6-*O*-benzylidene- $\alpha$ -D-glucopyranoside (2.14g, 76%). Its <sup>1</sup>H NMR spectrum was virtually identical with a reported one.<sup>[13]</sup>

The 4,6-protected sugar (148 mg, 524  $\mu$ mol) in DCM (3 mL) was added pyridine (900  $\mu$ L) and trifluoromethanesulfonic anhydride (220  $\mu$ L) and stirred at rt. After 30 mins, the mixture was diluted with DCM, washed sequentially with water and brine, and then dried over MgSO<sub>4</sub>. After removal of the solvent, the residue was dissolved in DMF (10 mL), added NaN<sub>3</sub> (374 mg) and NH<sub>4</sub>Cl (18 mg) and stirred overnight at 80°C. The mixture was brought to rt, diluted with EtOAc, washed sequentially with water and brine, and then dried over MgSO<sub>4</sub>. After removal of the solvent, the mixture was purified by silica-gel column chromatography (hexane-EtOAc = 10:1 to 5:1), which afforded methyl 2,3-diazido-2,3-deoxy-4,6-*O*-benzylidene- $\alpha$ -D-glucopyranoside **6**<sup>[14]</sup> (78 mg, 45% in 2 steps). <sup>1</sup>H NMR (CDCl<sub>3</sub>)  $\delta$  7.51–7.47 (m, ArH, 2H), 7.41–7.34 (m, ArH, 3H), 5.62 (s, CHPh, 1H), 4.66 (d, H-1, *J* = 0.8 Hz, 1H), 4.34–4.25 (m, H-6a, H-5, 2H), 4.10 (dd, H-3, *J* = 3.0, 3.0 Hz, 1H), 4.05 (dd, H-4, *J* = 9.3, 3.5 Hz, 1H), 3.83 (dd, H-2, *J* = 2.6, 1.0 Hz, 1H), 3.79 (dd, H-6b, *J* = 10.1, 10.1 Hz, 1H), 3.45 (s, OMe, 3H); <sup>13</sup>C NMR (CDCl<sub>3</sub>)  $\delta$  137.0 (Ar), 129.5 (Ar), 128.6 (Ar), 126.3 (Ar), 102.5 (CHPh), 99.04 (C-1), 75.7 (C-4), 69.1 (C-6), 61.3 (C-2), 58.9 (C-5), 58.5 (C-3), 56.1 (OMe).  $[\alpha]_D +20.8$  (*c* 1.0, CHCl<sub>3</sub>).

## References

1. Taniguchi, T.; Monde, K. *J. Am. Chem. Soc.* **2012**, *134*, 3695.
2. Hoshi, T.; Nozawa, E.; Katano, M.; Suzuki, T.; Hagiwara, H. *Tetrahedron Lett.* **2004**, *45*, 3485.
3. Zhao, L.; Qi, D.; Wang, K.; Wang, T.; Han, B.; Tang, Z.; Jiang, J. *Sci. Rep.* **2016**, *6*, 28026.
4. Vondenhof, M.; Mattay, J. *Chem. Ber.* **1990**, *123*, 2457.
5. Bartolome, C.; Garcia-Cuadrado, D.; Ramiro, Z.; Espinet, P. *Inorg. Chem.* **2010**, *49*, 9758.
6. Yamamoto, Y.; Hagiwara, T.; Yamazaki, H. *Inorg. Chim. Acta* **1986**, *115*, L35.
7. Schaller, G. R.; Topić, F.; Rissanen, K.; Okamoto, Y.; Shen, J.; Herges, R. *Nature Chem.* **2014**, *6*, 608.
8. Takeda, Y.; Okazaki, M.; Minakata, S. *Chem. Commun.* **2014**, *50*, 10291.
9. Huang, W.; Zhang, Y. C.; Jin, R.; Chen, B. L.; Chen, Z. *Organometallics* **2018**, *37*, 3196.
10. Aissaoui, R.; Nourry, A.; Coquel, A.; Dao, T. T. H.; Derdour, A.; Helesbeux, J.-J.; Duval, O.; Castanet, A.-S.; Mortier, J. *J. Org. Chem.* **2012**, *77*, 718.
11. Tnay, Y. L.; Chen, C.; Chua, Y. Y.; Zhang, L.; Chiba, S. *Org. Lett.* **2012**, *14*, 3550.
12. Liu, J.; Zheng, H.-K.; Yao, C.-Z.; Sun, B.-F.; Kang, Y.-B. *J. Am. Chem. Soc.* **2016**, *138*, 3294.
13. Chen, C.-T.; Weng, S.-S.; Kao, J.-Q.; Lin, C.-C.; Jan, M.-D. *Org. Lett.* **2005**, *7*, 3343.
14. Franconetti, A.; Álvarez, E.; Cabrera-Escribano, F. *Synlett* **2017**, *28*, 201.

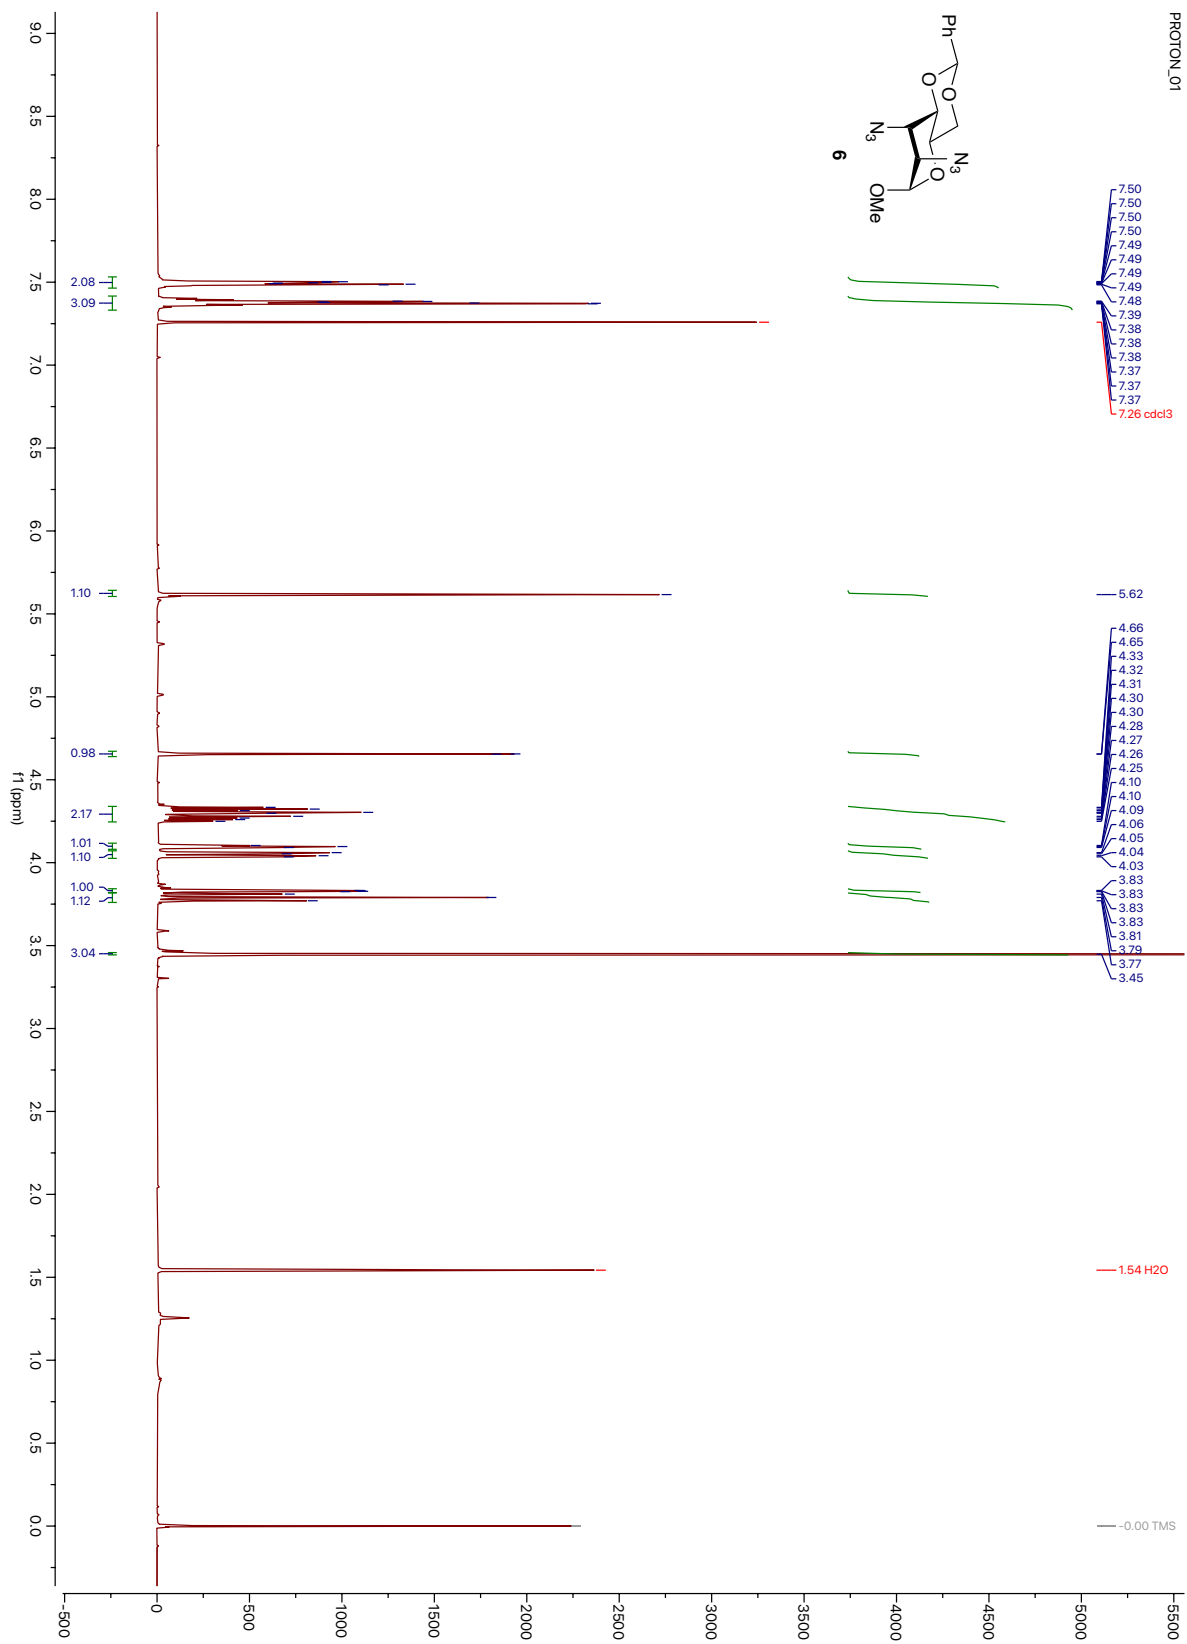

CARBON\_01

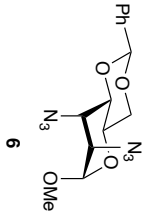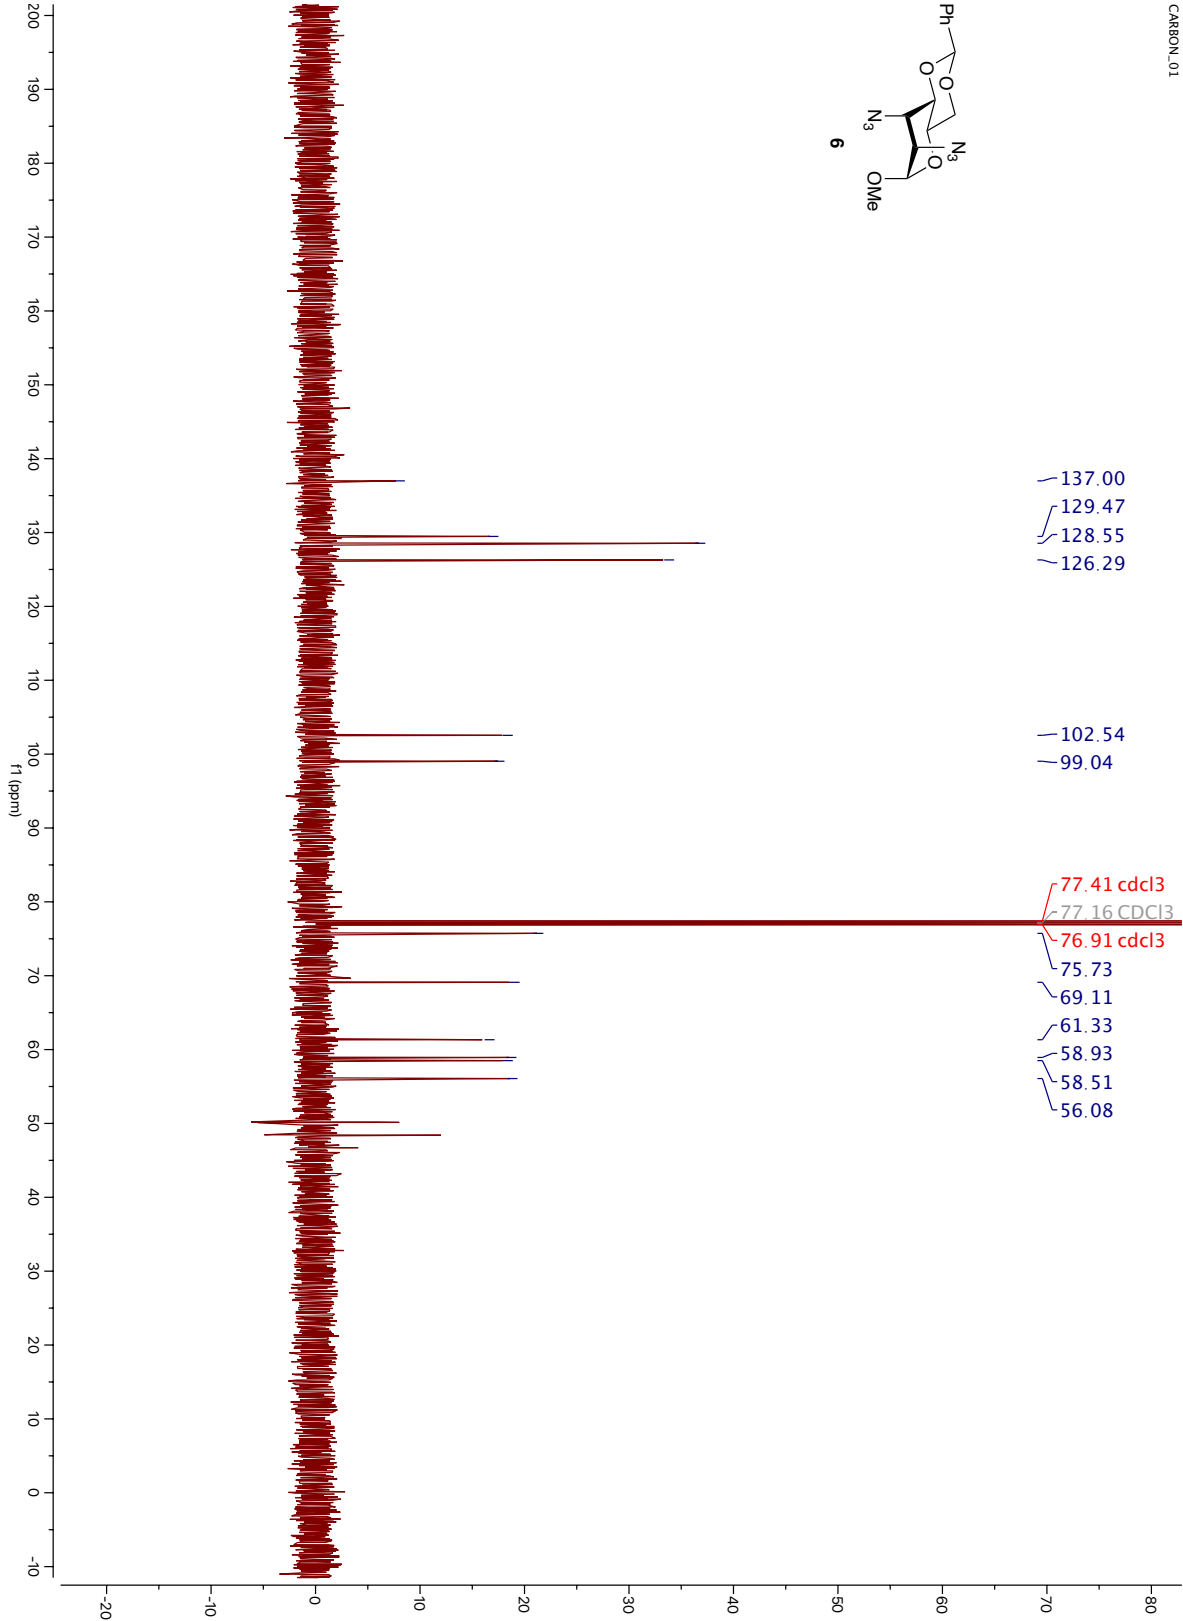

## Optimized Cartesian Coordinates

(S)-1 optimized at B3PW91/6-311++G(d,p)

|    |   |           |           |           |
|----|---|-----------|-----------|-----------|
| 1  | H | 3.056315  | -1.811085 | -1.809211 |
| 2  | C | 3.23911   | -1.040381 | -1.067836 |
| 3  | C | 3.647711  | 0.964473  | 0.874535  |
| 4  | C | 2.18821   | -0.554295 | -0.290983 |
| 5  | C | 4.502108  | -0.503553 | -0.868653 |
| 6  | C | 4.699983  | 0.492165  | 0.095888  |
| 7  | C | 2.37867   | 0.43011   | 0.675403  |
| 8  | H | 5.34191   | -0.849747 | -1.461827 |
| 9  | H | 5.694585  | 0.903688  | 0.237235  |
| 10 | H | 3.819538  | 1.735929  | 1.618788  |
| 11 | C | 0.775288  | -0.96728  | -0.314594 |
| 12 | C | 1.097099  | 0.745556  | 1.401669  |
| 13 | H | 1.146286  | 0.385347  | 2.435398  |
| 14 | H | 0.911197  | 1.822759  | 1.434209  |
| 15 | C | -0.000004 | -0.000085 | 0.620273  |
| 16 | O | 0.280272  | -1.889203 | -0.918533 |
| 17 | C | -0.775253 | 0.967238  | -0.314506 |
| 18 | C | -1.097138 | -0.745812 | 1.401538  |
| 19 | H | -0.911278 | -1.823029 | 1.433878  |
| 20 | H | -1.14631  | -0.385794 | 2.435334  |
| 21 | C | -2.188194 | 0.554316  | -0.290939 |
| 22 | C | -4.700021 | -0.492055 | 0.095824  |
| 23 | C | -3.239074 | 1.040553  | -1.067725 |
| 24 | C | -2.378699 | -0.430198 | 0.675327  |
| 25 | C | -3.647768 | -0.964516 | 0.874404  |
| 26 | C | -4.502099 | 0.503769  | -0.868598 |
| 27 | H | -3.056242 | 1.811338  | -1.809006 |
| 28 | H | -3.819631 | -1.736052 | 1.618565  |
| 29 | H | -5.341887 | 0.850081  | -1.461723 |
| 30 | H | -5.694643 | -0.90354  | 0.23713   |
| 31 | O | -0.280199 | 1.889213  | -0.918333 |

(S)-2•2CHCl<sub>3</sub> optimized at B3PW91/6-311++G(d,p)

|    |   |           |           |           |
|----|---|-----------|-----------|-----------|
| 1  | H | 0.743185  | -0.082225 | -3.601528 |
| 2  | C | 0.985076  | 0.615841  | -2.808884 |
| 3  | H | 2.702848  | 1.411088  | -3.78245  |
| 4  | C | 2.067292  | 1.44464   | -2.903484 |
| 5  | C | 0.434867  | 1.528301  | -0.605104 |
| 6  | C | 2.382031  | 2.353045  | -1.86344  |
| 7  | C | 0.162792  | 0.659034  | -1.653263 |
| 8  | C | 1.556577  | 2.399805  | -0.697663 |
| 9  | C | 3.499451  | 3.217329  | -1.9496   |
| 10 | H | 1.266062  | 3.355155  | 1.223065  |
| 11 | C | 3.791199  | 4.091212  | -0.933008 |
| 12 | H | 4.125332  | 3.173842  | -2.835421 |
| 13 | H | 4.65201   | 4.746992  | -1.009697 |
| 14 | C | 2.976312  | 4.139421  | 0.217996  |
| 15 | H | 3.216903  | 4.83263   | 1.01698   |
| 16 | C | 1.88642   | 3.314413  | 0.334832  |
| 17 | C | -0.162961 | 0.658372  | 1.652912  |
| 18 | C | -0.435298 | 1.527944  | 0.605073  |
| 19 | C | -2.067714 | 1.442924  | 2.90341   |
| 20 | C | -1.55728  | 2.399064  | 0.697948  |
| 21 | C | -0.985241 | 0.614497  | 2.808511  |
| 22 | C | -2.382729 | 2.351615  | 1.863701  |
| 23 | C | -1.887401 | 3.31395   | -0.334212 |
| 24 | H | -0.743138 | -0.083788 | 3.600898  |
| 25 | H | -4.126295 | 3.171507  | 2.835969  |
| 26 | H | -2.703267 | 1.408847  | 3.782359  |
| 27 | C | -2.977552 | 4.138574  | -0.217081 |
| 28 | H | -1.267049 | 3.355213  | -1.222426 |
| 29 | H | -3.218354 | 4.832002  | -1.015811 |
| 30 | C | -3.792433 | 4.089686  | 0.933899  |
| 31 | H | -4.65345  | 4.745167  | 1.010823  |

|    |    |           |           |           |
|----|----|-----------|-----------|-----------|
| 32 | C  | -3.50042  | 3.215517  | 1.95017   |
| 33 | C  | 0.96486   | -0.213971 | 1.581117  |
| 34 | C  | -0.964759 | -0.213683 | -1.581781 |
| 35 | N  | -1.876001 | -0.922825 | -1.545631 |
| 36 | N  | 1.876309  | -0.922834 | 1.544739  |
| 37 | H  | 3.745567  | -1.983495 | 0.930791  |
| 38 | H  | -3.744991 | -1.983752 | -0.931355 |
| 39 | C  | 4.662501  | -2.435124 | 0.562457  |
| 40 | C  | -4.661792 | -2.435415 | -0.562732 |
| 41 | Cl | 5.841738  | -1.129971 | 0.297551  |
| 42 | Cl | 4.285661  | -3.270683 | -0.960323 |
| 43 | Cl | 5.241645  | -3.577752 | 1.792107  |
| 44 | Cl | -4.284396 | -3.271124 | 0.959828  |
| 45 | Cl | -5.241385 | -3.577922 | -1.792282 |
| 46 | Cl | -5.840929 | -1.130284 | -0.297269 |

(S)-**3** optimized at B3PW91/6-311++G(d,p)

|    |   |           |           |           |
|----|---|-----------|-----------|-----------|
| 1  | H | -2.455887 | 2.013152  | -2.737559 |
| 2  | C | -2.271808 | 1.31614   | -1.928835 |
| 3  | H | -4.238795 | 0.504311  | -1.912451 |
| 4  | C | -3.249227 | 0.480235  | -1.467331 |
| 5  | C | -0.680588 | 0.421756  | -0.300049 |
| 6  | C | -2.99413  | -0.42328  | -0.406999 |
| 7  | C | -0.984555 | 1.282117  | -1.34086  |
| 8  | C | -1.694857 | -0.454611 | 0.185451  |
| 9  | C | -3.996596 | -1.29473  | 0.081719  |
| 10 | H | -0.472949 | -1.394509 | 1.703314  |
| 11 | C | -3.732928 | -2.163409 | 1.110666  |
| 12 | H | -4.982165 | -1.261866 | -0.372546 |
| 13 | H | -4.510014 | -2.825374 | 1.477954  |
| 14 | C | -2.450183 | -2.196303 | 1.696374  |
| 15 | H | -2.249562 | -2.884462 | 2.510818  |
| 16 | C | -1.455748 | -1.363861 | 1.246595  |
| 17 | C | 0.984555  | 1.282107  | 1.34087   |
| 18 | C | 0.680591  | 0.421754  | 0.30005   |



|    |   |           |           |           |
|----|---|-----------|-----------|-----------|
| 19 | C | 3.249228  | 0.480228  | 1.467334  |
| 20 | C | 1.694861  | -0.454606 | -0.185456 |
| 21 | C | 2.271808  | 1.316127  | 1.928845  |
| 22 | C | 2.994134  | -0.423278 | 0.406995  |
| 23 | C | 1.455754  | -1.363848 | -1.246609 |
| 24 | H | 2.455887  | 2.013131  | 2.737575  |
| 25 | H | 4.982171  | -1.26186  | 0.372534  |
| 26 | H | 4.238796  | 0.504302  | 1.912455  |
| 27 | C | 2.45019   | -2.196283 | -1.696395 |
| 28 | H | 0.472955  | -1.394492 | -1.703328 |
| 29 | H | 2.249573  | -2.884435 | -2.510845 |
| 30 | C | 3.732936  | -2.163392 | -1.110686 |
| 31 | H | 4.510022  | -2.825352 | -1.477981 |
| 32 | C | 3.996603  | -1.294722 | -0.081732 |
| 33 | N | -0.021469 | 2.138518  | -1.836528 |
| 34 | C | 0.777508  | 2.875829  | -2.282543 |
| 35 | N | 0.021466  | 2.138501  | 1.836545  |
| 36 | C | -0.77755  | 2.875752  | 2.282587  |

(S)-4 optimized at B3PW91/6-311++G(d,p)

|    |   |           |           |           |
|----|---|-----------|-----------|-----------|
| 1  | C | 3.751591  | -2.173134 | -1.047506 |
| 2  | C | 3.990231  | -1.320274 | 0.001142  |
| 3  | C | 2.978418  | -0.451714 | 0.475706  |
| 4  | C | 1.695163  | -0.467763 | -0.150899 |
| 5  | C | 1.482495  | -1.361302 | -1.231855 |
| 6  | C | 2.484672  | -2.191921 | -1.667902 |
| 7  | H | 4.182318  | 0.445791  | 2.03169   |
| 8  | H | 4.535626  | -2.83412  | -1.402377 |
| 9  | H | 4.963024  | -1.299446 | 0.483546  |
| 10 | C | 3.205378  | 0.433763  | 1.55786   |
| 11 | C | 0.671649  | 0.404279  | 0.322635  |
| 12 | H | 0.512154  | -1.379511 | -1.715082 |
| 13 | H | 2.302704  | -2.867949 | -2.497012 |
| 14 | C | 0.930926  | 1.25545   | 1.390622  |
| 15 | C | 2.214847  | 1.262065  | 2.003814  |
| 16 | H | 2.387866  | 1.939635  | 2.832199  |
| 17 | C | -0.671654 | 0.404272  | -0.322642 |

|    |   |           |           |           |
|----|---|-----------|-----------|-----------|
| 18 | C | -1.695172 | -0.467753 | 0.150916  |
| 19 | C | -0.930927 | 1.255412  | -1.390655 |
| 20 | C | -1.482508 | -1.361262 | 1.231897  |
| 21 | C | -2.978426 | -0.451718 | -0.475691 |
| 22 | C | -2.214847 | 1.262015  | -2.003848 |
| 23 | C | -2.484689 | -2.191865 | 1.667967  |
| 24 | H | -0.512168 | -1.379461 | 1.715126  |
| 25 | C | -3.990243 | -1.32026  | -0.001104 |
| 26 | C | -3.205381 | 0.433729  | -1.557871 |
| 27 | H | -2.387862 | 1.939562  | -2.832252 |
| 28 | C | -3.751607 | -2.173092 | 1.047568  |
| 29 | H | -2.302725 | -2.86787  | 2.497096  |
| 30 | H | -4.963036 | -1.299442 | -0.48351  |
| 31 | H | -4.182322 | 0.445748  | -2.031703 |
| 32 | H | -4.535645 | -2.834065 | 1.402457  |
| 33 | C | 0.071188  | 2.133123  | -1.895397 |
| 34 | C | -0.071186 | 2.133177  | 1.895341  |
| 35 | C | 0.895113  | 2.885537  | -2.352399 |
| 36 | H | 1.631808  | 3.546048  | -2.74333  |
| 37 | C | -0.89509  | 2.885617  | 2.352339  |
| 38 | H | -1.63137  | 3.546797  | 2.74292   |

(S)-**5** (the most stable conformer) optimized at B3PW91/6-311++G(d,p)

|    |   |          |           |           |
|----|---|----------|-----------|-----------|
| 1  | C | 1.120316 | 0.976708  | 1.211665  |
| 2  | C | 0.708671 | 0.094952  | 0.226666  |
| 3  | C | 3.382269 | 0.144423  | 1.116809  |
| 4  | C | 1.658588 | -0.800971 | -0.343645 |
| 5  | C | 2.464279 | 1.001424  | 1.657762  |
| 6  | C | 3.013525 | -0.776929 | 0.107559  |
| 7  | C | 1.304097 | -1.726425 | -1.35824  |
| 8  | H | 2.763395 | 1.703016  | 2.430177  |
| 9  | H | 4.978771 | -1.641205 | -0.112231 |
| 10 | H | 4.411869 | 0.165848  | 1.46078   |
| 11 | C | 2.237946 | -2.579915 | -1.891669 |
| 12 | H | 0.278642 | -1.752538 | -1.709402 |
| 13 | H | 1.945899 | -3.280492 | -2.667325 |
| 14 | C | 3.575265 | -2.554898 | -1.442658 |

|    |   |           |           |           |
|----|---|-----------|-----------|-----------|
| 15 | H | 4.302658  | -3.234654 | -1.873872 |
| 16 | C | 3.951458  | -1.669969 | -0.463403 |
| 17 | C | -1.120179 | 0.976669  | -1.211774 |
| 18 | C | -0.708705 | 0.095027  | -0.226609 |
| 19 | C | -3.382232 | 0.144738  | -1.116931 |
| 20 | C | -1.658796 | -0.800647 | 0.343836  |
| 21 | C | -2.464103 | 1.001535  | -1.657969 |
| 22 | C | -3.01369  | -0.776479 | -0.107466 |
| 23 | C | -1.304505 | -1.725965 | 1.358609  |
| 24 | H | -2.763078 | 1.703034  | -2.430521 |
| 25 | H | -4.979093 | -1.640386 | 0.112362  |
| 26 | H | -4.411806 | 0.166229  | -1.460977 |
| 27 | C | -2.238522 | -2.579227 | 1.892123  |
| 28 | H | -0.279077 | -1.752173 | 1.709846  |
| 29 | H | -1.946626 | -3.279717 | 2.667914  |
| 30 | C | -3.575805 | -2.554081 | 1.443028  |
| 31 | H | -4.303332 | -3.233645 | 1.874319  |
| 32 | C | -3.951802 | -1.669262 | 0.463591  |
| 33 | N | 0.137518  | 1.840016  | 1.740882  |
| 34 | N | 0.452245  | 2.643231  | 2.611955  |
| 35 | N | 0.601353  | 3.42842   | 3.415039  |
| 36 | N | -0.137172 | 1.839875  | -1.74084  |
| 37 | N | -0.451534 | 2.642638  | -2.612482 |
| 38 | N | -0.600507 | 3.427595  | -3.415805 |

(*R*)-**2a**•CHCl<sub>3</sub> optimized at B3PW91/6-311++G(d,p)

|    |   |           |          |           |
|----|---|-----------|----------|-----------|
| 1  | H | -0.102918 | 1.838565 | 3.509255  |
| 2  | C | 0.265621  | 1.812676 | 2.489345  |
| 3  | H | -0.305248 | 3.826185 | 2.055794  |
| 4  | C | 0.153428  | 2.915322 | 1.683045  |
| 5  | C | 1.332928  | 0.558985 | 0.705397  |
| 6  | C | 0.624984  | 2.885678 | 0.348132  |
| 7  | C | 1.226295  | 1.692031 | -0.156962 |
| 8  | C | 0.510421  | 4.011829 | -0.504117 |
| 9  | H | 2.133086  | 0.774678 | -1.895549 |
| 10 | C | 0.964959  | 3.966781 | -1.797578 |
| 11 | H | 0.050121  | 4.914622 | -0.113844 |

|    |    |           |           |           |
|----|----|-----------|-----------|-----------|
| 12 | H  | 0.868417  | 4.835587  | -2.440312 |
| 13 | C  | 1.554655  | 2.786878  | -2.298586 |
| 14 | H  | 1.906892  | 2.756478  | -3.324491 |
| 15 | C  | 1.682075  | 1.678053  | -1.499312 |
| 16 | C  | 1.13531   | -1.751927 | -0.21914  |
| 17 | C  | 1.942864  | -0.711192 | 0.220557  |
| 18 | C  | 3.040694  | -3.155504 | -0.686343 |
| 19 | C  | 3.357337  | -0.891119 | 0.214394  |
| 20 | C  | 1.686159  | -2.980107 | -0.673595 |
| 21 | C  | 3.909464  | -2.126171 | -0.246212 |
| 22 | C  | 4.241188  | 0.123897  | 0.661972  |
| 23 | H  | 1.01752   | -3.764925 | -1.007747 |
| 24 | H  | 5.727792  | -3.235208 | -0.597438 |
| 25 | H  | 3.466311  | -4.091409 | -1.034087 |
| 26 | C  | 5.599467  | -0.071744 | 0.648503  |
| 27 | H  | 3.826612  | 1.059964  | 1.017977  |
| 28 | H  | 6.261892  | 0.714822  | 0.994244  |
| 29 | C  | 6.142723  | -1.290295 | 0.189279  |
| 30 | H  | 7.2185    | -1.431652 | 0.184341  |
| 31 | C  | 5.314942  | -2.294328 | -0.246646 |
| 32 | C  | -0.285039 | -1.6047   | -0.231459 |
| 33 | N  | -1.437456 | -1.527226 | -0.257667 |
| 34 | H  | -3.584155 | -0.985488 | -0.136351 |
| 35 | C  | -4.632656 | -0.709299 | -0.062533 |
| 36 | Cl | -4.843826 | 0.858993  | -0.870914 |
| 37 | Cl | -5.046727 | -0.598247 | 1.66315   |
| 38 | Cl | -5.586595 | -1.97549  | -0.866271 |
| 39 | C  | 0.85719   | 0.631713  | 1.996349  |
| 40 | H  | 0.938846  | -0.235727 | 2.643547  |

**6** (the most stable conformer) optimized at B3PW91/6-311++G(d,p)

|   |   |          |           |           |
|---|---|----------|-----------|-----------|
| 1 | O | 2.091929 | -1.524906 | 0.424825  |
| 2 | C | 0.373087 | -0.130032 | -0.501439 |
| 3 | C | 2.721907 | 0.678207  | -0.496892 |
| 4 | C | 1.247051 | 1.117718  | -0.473777 |
| 5 | C | 3.046496 | -0.488966 | 0.466762  |
| 6 | C | 0.7585   | -1.070951 | 0.631142  |

|    |   |           |           |           |
|----|---|-----------|-----------|-----------|
| 7  | H | 0.559505  | -0.647659 | -1.456419 |
| 8  | H | 0.673657  | -0.542915 | 1.587596  |
| 9  | H | 3.977255  | -0.978686 | 0.144433  |
| 10 | H | 1.060945  | 1.716398  | -1.372615 |
| 11 | H | 3.346542  | 1.529976  | -0.209853 |
| 12 | O | 3.205436  | 0.056433  | 1.73727   |
| 13 | C | 3.741178  | -0.851034 | 2.687709  |
| 14 | H | 3.070835  | -1.699173 | 2.856979  |
| 15 | H | 3.86392   | -0.292636 | 3.615401  |
| 16 | H | 4.719198  | -1.228038 | 2.359584  |
| 17 | N | 2.989185  | 0.28094   | -1.892114 |
| 18 | N | 4.16648   | 0.146599  | -2.206053 |
| 19 | N | 5.210524  | -0.002431 | -2.619823 |
| 20 | N | 1.026959  | 1.92552   | 0.731634  |
| 21 | N | 0.091322  | 2.718589  | 0.696726  |
| 22 | N | -0.716233 | 3.50418   | 0.800669  |
| 23 | O | -0.990168 | 0.229994  | -0.401908 |
| 24 | C | -0.18787  | -2.258439 | 0.609974  |
| 25 | H | -0.018619 | -2.851964 | -0.301397 |
| 26 | H | -0.051785 | -2.905403 | 1.477731  |
| 27 | O | -1.524464 | -1.778549 | 0.654852  |
| 28 | C | -1.820369 | -0.922074 | -0.423116 |
| 29 | C | -3.254839 | -0.490577 | -0.33372  |
| 30 | C | -5.920341 | 0.310166  | -0.173882 |
| 31 | C | -4.133079 | -0.765191 | -1.377986 |
| 32 | C | -3.714886 | 0.187899  | 0.794915  |
| 33 | C | -5.043059 | 0.586663  | 0.872924  |
| 34 | C | -5.464718 | -0.366328 | -1.29988  |
| 35 | H | -3.776741 | -1.293737 | -2.257537 |
| 36 | H | -3.028846 | 0.400552  | 1.606751  |
| 37 | H | -5.396668 | 1.115997  | 1.751719  |
| 38 | H | -6.14368  | -0.583955 | -2.117818 |
| 39 | H | -6.957534 | 0.623259  | -0.110546 |
| 40 | H | -1.631871 | -1.461953 | -1.367987 |
